# Supplementary material
Source: publisher site journal article supplement (https://www.dovepress.com/article/345664)

Supplementary Material:

Supplemental Figure 1. The expression levels of the top 10 key genes in GSE36830.

Supplemental Figure 2. Bioinformatics analyses of difference groups. A. NP from CRSwNP compared with UT from CRSsNP. B. NP from CRSwNP compared with UT from CRSwNP. NP: nasal polyps; CRSwNP: Chronic rhinosinusitis with nasal polyps; UT: uncinatate tissues; CRSsNP: Chronic rhinosinusitis without nasal polyps.

Supplemental Figure 1.

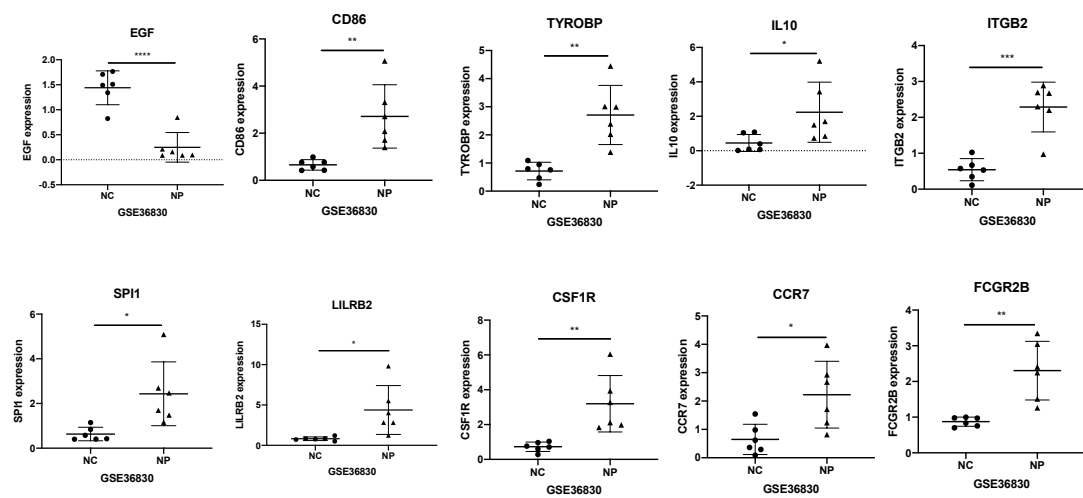

Supplemental Figure 2.

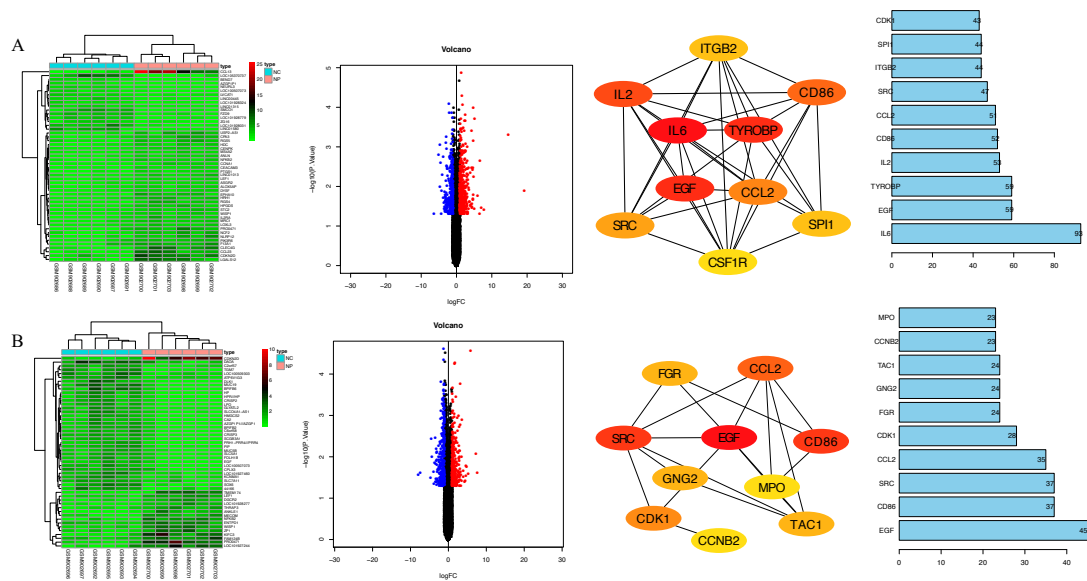

Supplement: Supplementary file 1 [file get_supplementary_file.php]
